# Supplementary material
Source: ML conference proceedings conference paper supplement (https://openaccess.thecvf.com/content/CVPR2026/html/Wang_Improving_Sparse_Autoencoder_CVPR_2026_paper.html)
Supplement: Supplementary file 1 [file Wang_Improving_Sparse_Autoencoder_CVPR_2026_supplemental.pdf]

# Improving Sparse Autoencoder with Dynamic Attention

## Supplementary Material

### 6. Proof of Prop. 1

**1. Problem formulation.** Recall that sparsemax is the Euclidean projection of  $\mathbf{z} \in \mathbb{R}^M$  onto the probability simplex

$$\Delta^{M-1} = \{\mathbf{p} \in \mathbb{R}^M \mid \mathbf{1}^\top \mathbf{p} = 1, \mathbf{p} \geq \mathbf{0}\}, \quad (8)$$

i.e.

$$\text{sparsemax}(\mathbf{z}) = \arg \min_{\mathbf{p} \in \Delta^{M-1}} \frac{1}{2} \|\mathbf{p} - \mathbf{z}\|_2^2. \quad (9)$$

Equivalently, we solve the constrained quadratic program

$$\min_{\mathbf{p} \in \mathbb{R}^M} \frac{1}{2} \sum_{i=1}^M (p_i - z_i)^2 \quad \text{subject to} \quad \sum_{i=1}^M p_i = 1, \quad p_i \geq 0 \forall i. \quad (10)$$

**2. Lagrangian and KKT conditions.** Introduce the Lagrange multiplier  $\tau \in \mathbb{R}$  for the equality constraint  $\sum_i p_i = 1$  and multipliers  $\mu_i \geq 0$  for the inequality constraints  $p_i \geq 0$ . The (augmented) Lagrangian is

$$\mathcal{L}(\mathbf{p}, \tau, \boldsymbol{\mu}) = \frac{1}{2} \sum_{i=1}^M (p_i - z_i)^2 + \tau \left( \sum_{i=1}^M p_i - 1 \right) - \sum_{i=1}^M \mu_i p_i. \quad (11)$$

Karush–Kuhn–Tucker (KKT) conditions for optimality are:

- (i) *Primal feasibility:*  $\sum_{i=1}^M p_i = 1, p_i \geq 0$  for all  $i$ .
- (ii) *Dual feasibility:*  $\mu_i \geq 0$  for all  $i$ .
- (iii) *Stationarity:*

$$\frac{\partial \mathcal{L}}{\partial p_i} = p_i - z_i + \tau - \mu_i = 0 \quad \implies \quad p_i = z_i - \tau + \mu_i, \quad \forall i. \quad (12)$$

(iv) *Complementary slackness:*

$$\mu_i p_i = 0, \quad \forall i. \quad (13)$$

Given Eq. 12 and Eq. 13, we have:

- If  $p_i > 0$ , complementary slackness forces  $\mu_i = 0$ . Hence

$$p_i = z_i - \tau \quad \text{and thus} \quad z_i - \tau > 0.$$

- If  $p_i = 0$ , complementary slackness allows  $\mu_i \geq 0$  and stationarity gives

$$0 = z_i - \tau + \mu_i \quad \implies \quad \mu_i = \tau - z_i.$$

Since  $\mu_i \geq 0$ , we conclude  $\tau - z_i \geq 0$ , i.e.  $z_i \leq \tau$ .

Combining both cases yields the compact expression (Eq. 4 in the main paper)

$$p_i = \max(z_i - \tau, 0), \quad \forall i, \quad (14)$$

**3. Determining  $\tau$  and the active set.** Let the active set (support) be

$$S = \{i \mid p_i > 0\} = \{i \mid z_i > \tau\}, \quad k := |S|. \quad (15)$$

Summing  $p_i = z_i - \tau$  over  $i \in S$  and using  $\sum_{i=1}^M p_i = 1$  gives

$$\sum_{i \in S} (z_i - \tau) = 1 \quad \implies \quad \sum_{i \in S} z_i - k\tau = 1. \quad (16)$$

Thus

$$\tau = \frac{\sum_{i \in S} z_i - 1}{k}. \quad (17)$$

To find  $S$  efficiently, sort the coordinates in descending order:

$$z_{(1)} \geq z_{(2)} \geq \dots \geq z_{(M)}. \quad (18)$$

If the optimal support corresponds to the top  $k$  indices (this is always the case: if some  $j \in S$  were not among the top  $k$ , there would be an index in the top  $k$  not in  $S$  with a larger  $z$ , contradicting  $z_j > \tau$ ), then

$$\tau_k = \frac{\sum_{i=1}^k z_{(i)} - 1}{k}. \quad (19)$$

The correct  $k$  is the largest integer for which the  $k$ -th sorted element exceeds this threshold:

$$z_{(k)} > \tau_k \quad \iff \quad z_{(k)} + \frac{1 - \sum_{i=1}^k z_{(i)}}{k} > 0. \quad (20)$$

Therefore set

$$k = \max \left\{ r \in \{1, \dots, M\} \mid z_{(r)} + \frac{1 - \sum_{i=1}^r z_{(i)}}{r} > 0 \right\}, \quad (21)$$

and then take  $\tau = \tau_k$ , which completes the proof.

### 7. More Visualization Results

**Analysis of Top 3 Concepts.** Fig. 6–8 show the visualizations of the top three concepts of the test image. Overall, we find that our Sparsemax SAE successfully captures the key visual patterns. For example, the mixture of fruit, wooden background, and apples in Fig. 6. Moreover, our approach is able to understand visual features from different perspectives. For example, the first concept in Fig. 7 corresponds to a pig (the main object of the input image), the second concept is related to cartoon characters, and the third concept is about the dressing.

Table 5. Sparsity metric values.

| Model     | $L_0 \uparrow$ | FVU $\downarrow$ | CS $\uparrow$ | CKNNA $\uparrow$ | DO $\downarrow$ |
|-----------|----------------|------------------|---------------|------------------|-----------------|
| ReLU      | 0.928          | <b>0.098</b>     | <b>0.953</b>  | <b>0.812</b>     | 0.003           |
| TopK      | 0.966          | 0.169            | 0.925         | 0.701            | 0.003           |
| BatchTopK | 0.814          | 0.278            | 0.904         | 0.750            | 0.002           |
| Ours      | <b>0.979</b>   | 0.129            | 0.934         | 0.796            | <b>0.001</b>    |

Table 6. Interpretability metrics.

| Model     | MEAN-MS       | MAX-MS        |
|-----------|---------------|---------------|
| ReLU      | 0.1627        | 0.9172        |
| TopK      | 0.0548        | 0.8751        |
| BatchTopK | 0.1243        | 0.9031        |
| Ours      | <b>0.3484</b> | <b>0.9575</b> |

**Failure Cases.** We also provide several failure cases of our Sparsemax SAE in Fig. 9- 11. On one hand, we find that the learned concepts sometimes contain unclear visual patterns (The third concept in Fig. 9 and the first concept in Fig. 11). This may stem from feature absorption issues, where the learned concepts fail to decompose into their subconcepts. On the other hand, the learned concepts occasionally share the similar masking content of the input image. We attribute this to the fine-grained feature of the learned concepts, where concepts capture the similar visual patterns while focusing on distinct dimensions. For example, the concepts of baby, cute girl, and playing girl in Fig. 10.

**Sparsity and Interpretability Analysis** To further evaluate the quality of the learned concepts, we report sparsity metric values in Table. 5 and interpretability metrics in Table. 6. Following prior work [30, 38], we compute metrics including  $L_0$  (higher is better), FVU (fraction of variance unexplained, lower is better), CS (cosine similarity, higher is better), CKNNA (higher is better), and DO (dead concepts, lower is better). For interpretability, we follow the evaluation protocol in [47] and report both the mean and maximum monosemantic scores of the learned concepts. Our Sparsemax SAE achieves the best performance under most metrics, demonstrating that the dynamic attention mechanism not only produces sparse representations but also yields more interpretable and semantically coherent concepts.

## 8. Results of Zero-shot Image Classification

We report the detailed zero-shot image classification results in Table. 7- 17.

Table 7. Zero-shot classification results on the Caltech101 dataset.  $K = 32$  in TopK and BatchTopK.

|                      | no_sae | on_1   | on_5   | on_10  | on_50  | on_49152 |
|----------------------|--------|--------|--------|--------|--------|----------|
| ReLU                 | 32.403 | 7.816  | 17.591 | 21.033 | 28.671 | 31.672   |
| JumpReLU             | 32.403 | 3.578  | 12.840 | 18.594 | 27.845 | 28.974   |
| Gated                | 32.403 | 5.894  | 14.054 | 22.847 | 28.847 | 30.158   |
| TOPK                 | 32.403 | 5.94   | 16.632 | 23.096 | 30.654 | 29.645   |
| BatchTopK            | 32.403 | 11.567 | 23.144 | 27.314 | 30.582 | 31.284   |
| Saprsemax SAE (Ours) | 32.403 | 20.121 | 26.195 | 29.322 | 31.325 | 31.875   |

Table 8. Zero-shot classification results on the DTD dataset.  $K = 32$  in TopK and BatchTopK.

|                      | no_sae | on_1   | on_5   | on_10  | on_50  | on_49152 |
|----------------------|--------|--------|--------|--------|--------|----------|
| ReLU                 | 44.840 | 13.457 | 27.074 | 34.326 | 44.468 | 41.596   |
| JumpReLU             | 44.840 | 4.825  | 22.884 | 30.520 | 44.495 | 40.367   |
| Gated                | 44.840 | 5.989  | 15.048 | 21.495 | 47.187 | 37.365   |
| TopK                 | 44.840 | 6.117  | 15.372 | 22.624 | 46.365 | 35.851   |
| BatchTopK            | 44.840 | 17.730 | 30.372 | 36.383 | 49.007 | 40.957   |
| Saprsemax SAE (Ours) | 44.840 | 34.804 | 41.791 | 46.986 | 50.16  | 44.025   |

Table 9. Zero-shot classification results on the EuroSAT dataset.  $K = 32$  in TopK and BatchTopK.

|                      | no_sae | on_1   | on_5   | on_10  | on_50  | on_49152 |
|----------------------|--------|--------|--------|--------|--------|----------|
| ReLU                 | 38.605 | 10.200 | 24.826 | 32.939 | 39.832 | 33.315   |
| JumpReLU             | 38.605 | 11.680 | 20.475 | 33.648 | 40.987 | 32.158   |
| Gated                | 38.605 | 15.815 | 32.487 | 39.846 | 44.682 | 34.577   |
| TopK                 | 38.605 | 16.46  | 11.468 | 25.344 | 47.041 | 32.741   |
| BatchTopK            | 38.605 | 10.0   | 34.990 | 34.957 | 45.317 | 31.338   |
| Saprsemax SAE (Ours) | 38.605 | 19.301 | 36.463 | 34.056 | 47.839 | 32.421   |

Table 10. Zero-shot classification results on the FGVC dataset.  $K = 32$  in TopK and BatchTopK.

|                      | no_sae | on_1   | on_5  | on_10   | on_50  | on_49152 |
|----------------------|--------|--------|-------|---------|--------|----------|
| ReLU                 | 23.137 | 2.371  | 2.617 | 3.314   | 7.431  | 19.803   |
| JumpReLU             | 23.137 | 2.647  | 2.689 | 4.047   | 7.846  | 17.358   |
| Gated                | 23.137 | 1.574  | 4.855 | 5.128   | 7.748  | 11.547   |
| TopK                 | 23.137 | 1.02   | 1.683 | 3.156   | 9.18   | 7.59     |
| BatchTopK            | 23.136 | 0.990  | 5.191 | 7.390   | 10.805 | 14.362   |
| Saprsemax SAE (Ours) | 23.137 | 4.8346 | 7.069 | 8.14871 | 10.894 | 19.5187  |

Table 11. Zero-shot classification results on the Food101 dataset.  $K = 32$  in TopK and BatchTopK.

|                      | no_sae | on_1    | on_5   | on_10  | on_50   | on_49152 |
|----------------------|--------|---------|--------|--------|---------|----------|
| ReLU                 | 83.195 | 17.991  | 34.420 | 39.286 | 56.2719 | 78.285   |
| JumpReLU             | 83.195 | 19.475  | 35.187 | 39.954 | 67.257  | 75.481   |
| Gated                | 83.195 | 7.458   | 25.486 | 36.487 | 60.875  | 77.584   |
| TopK                 | 83.195 | 8.644   | 21.735 | 30.207 | 57.888  | 54.956   |
| BatchTopK            | 83.194 | 6.459   | 37.864 | 48.996 | 68.365  | 75.440   |
| Saprsemax SAE (Ours) | 83.195 | 26.1134 | 51.705 | 59.23  | 69.49   | 79.954   |

Table 12. Zero-shot classification results on the ImageNet dataset.  $K = 32$  in TopK and BatchTopK.

|                      | no_sae | on_1   | on_5   | on_10  | on_50  | on_49152 |
|----------------------|--------|--------|--------|--------|--------|----------|
| ReLU                 | 67.294 | 3.116  | 15.829 | 22.173 | 34.872 | 63.670   |
| JumpReLU             | 67.294 | 3.548  | 17.558 | 34.975 | 40.876 | 62.957   |
| Gated                | 67.294 | 5.568  | 12.875 | 35.495 | 50.159 | 62.547   |
| TopK                 | 67.294 | 3.421  | 8.2501 | 32.646 | 56.135 | 47.956   |
| BatchTopK            | 67.294 | 1.58   | 15.562 | 27.782 | 58.472 | 61.072   |
| Saprsemax SAE (Ours) | 67.294 | 10.929 | 33.469 | 42.127 | 59.947 | 65.087   |

Table 13. Zero-shot classification results on the ImageNet-Sketch dataset.  $K = 32$  in TopK and BatchTopK.

|                      | no_sae | on_1   | on_5   | on_10  | on_50  | on_49152 |
|----------------------|--------|--------|--------|--------|--------|----------|
| ReLU                 | 47.851 | 2.798  | 10.283 | 13.451 | 23.479 | 31.009   |
| JumpReLU             | 47.851 | 3.847  | 12.657 | 15.984 | 26.581 | 30.257   |
| Gated                | 47.851 | 1.782  | 9.257  | 13.576 | 38.712 | 32.157   |
| TopK                 | 47.851 | 0.957  | 8.1269 | 14.712 | 36.942 | 30.991   |
| BatchTopK            | 47.851 | 0.3509 | 7.349  | 16.103 | 39.128 | 34.178   |
| Saprsemax SAE (Ours) | 47.851 | 12.460 | 25.321 | 29.678 | 39.328 | 42.314   |

Table 14. Zero-shot classification results on the OxfordPets dataset.  $K = 32$  in TopK and BatchTopK.

|                      | no_sae | on_1   | on_5   | on_10  | on_50  | on_49152 |
|----------------------|--------|--------|--------|--------|--------|----------|
| ReLU                 | 83.477 | 26.964 | 49.611 | 61.350 | 71.127 | 79.061   |
| JumpReLU             | 83.477 | 26.981 | 50.258 | 63.204 | 73.980 | 78.041   |
| Gated                | 83.477 | 18.547 | 53.492 | 64.581 | 74.012 | 76.251   |
| TopK                 | 83.477 | 6.973  | 44.886 | 52.492 | 79.621 | 65.274   |
| BatchTopK            | 83.477 | 17.081 | 56.985 | 67.100 | 76.918 | 77.828   |
| Saprsemax SAE (Ours) | 83.477 | 25.186 | 58.135 | 67.925 | 77.351 | 80.986   |

Table 15. Zero-shot classification results on the StandfordCars dataset.  $K = 32$  in TopK and BatchTopK.

|                      | no_sae | on_1  | on_5  | on_10 | on_50   | on_49152 |
|----------------------|--------|-------|-------|-------|---------|----------|
| ReLU                 | 31.976 | 0.828 | 3.307 | 5.383 | 9.778   | 24.602   |
| JumpReLU             | 31.976 | 1.568 | 3.964 | 5.421 | 9.157   | 20.367   |
| Gated                | 31.976 | 0.540 | 3.541 | 6.034 | 10.652  | 19.068   |
| TopK                 | 31.976 | 0.610 | 2.735 | 3.263 | 6.897   | 8.7586   |
| BatchTopK            | 31.976 | 1.248 | 3.811 | 6.786 | 10.1140 | 18.987   |
| Saprsemax SAE (Ours) | 31.976 | 3.421 | 8.25  | 9.337 | 13.155  | 27.245   |

Table 16. Zero-shot classification results on the SUN397 dataset.  $K = 32$  in TopK and BatchTopK.

|                      | no_sae | on_1   | on_5   | on_10   | on_50  | on_49152 |
|----------------------|--------|--------|--------|---------|--------|----------|
| ReLU                 | 66.257 | 4.543  | 19.045 | 25.902  | 44.859 | 60.704   |
| JumpReLU             | 66.257 | 5.962  | 22.084 | 25.035  | 48.258 | 58.367   |
| Gated                | 66.257 | 6.058  | 27.643 | 31.247  | 52.796 | 58.947   |
| TopK                 | 66.257 | 5.2819 | 20.468 | 29.9    | 54.277 | 45.027   |
| BatchTopK            | 66.257 | 5.117  | 29.824 | 40.5    | 57.203 | 60.431   |
| Saprsemax SAE (Ours) | 66.257 | 15.946 | 39.904 | 48.4794 | 56.973 | 63.788   |

Table 17. Zero-shot classification results on the UCF101 dataset.  $K = 32$  in TopK and BatchTopK.

|                      | no_sae | on_1   | on_5   | on_10  | on_50  | on_49152 |
|----------------------|--------|--------|--------|--------|--------|----------|
| ReLU                 | 61.322 | 7.607  | 19.600 | 26.056 | 42.945 | 58.626   |
| TopK                 | 61.322 | 3.039  | 18.003 | 26.157 | 41.396 | 34.647   |
| BatchTopK            | 61.322 | 3.591  | 26.474 | 33.346 | 45.194 | 56.986   |
| JumpReLU             | 61.322 | 6.257  | 20.587 | 26.971 | 43.579 | 51.278   |
| Gated                | 61.322 | 4.068  | 24.947 | 30.189 | 43.840 | 52.497   |
| Saprsemax SAE (Ours) | 61.322 | 21.712 | 33.575 | 37.779 | 47.214 | 59.064   |

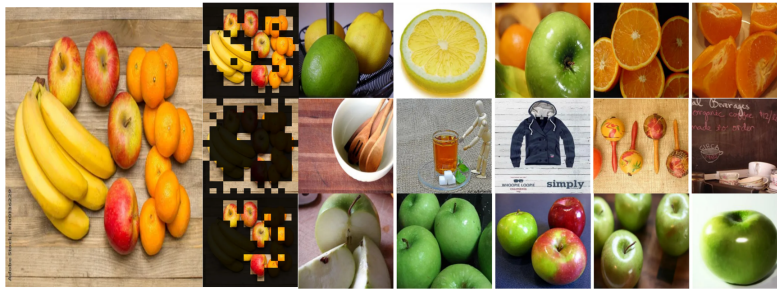

Figure 6. This picture successfully activates three different concepts: fruit, background and apple.

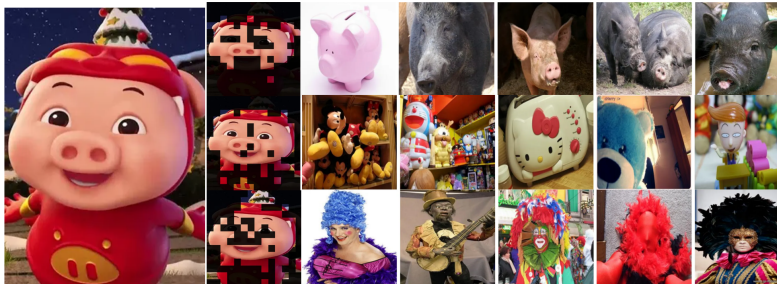

Figure 7. This picture is from the cartoon task image in the animation. It can be seen that it has the characteristics of pigs. Therefore, the features of pig are activated through sae, and other relevant features are activated according to its shape.

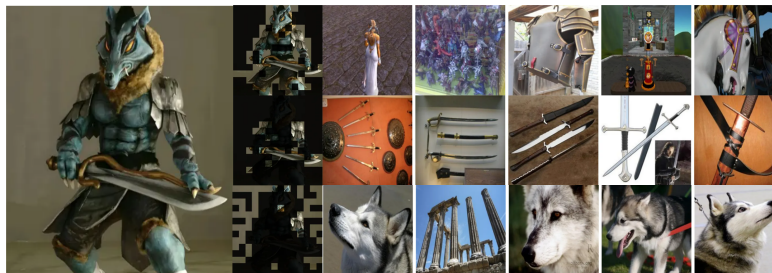

Figure 8. This picture is from the monster in the film and television image. Its wolf's head features activate the wolf's features through sae. In addition, his armor and weapons also activate the corresponding features.

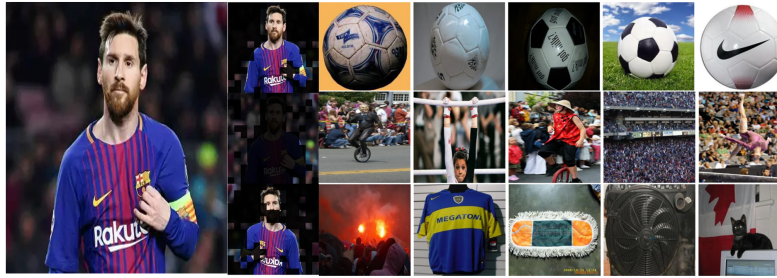

Figure 9. Messi's picture in this example activated the football. In addition, in this experiment, sae activated the "crowd" feature through the background of the picture, but unfortunately there is a phenomenon of feature absorption in the third feature, where images of short sleeves and similar color structures are considered to be the same concept

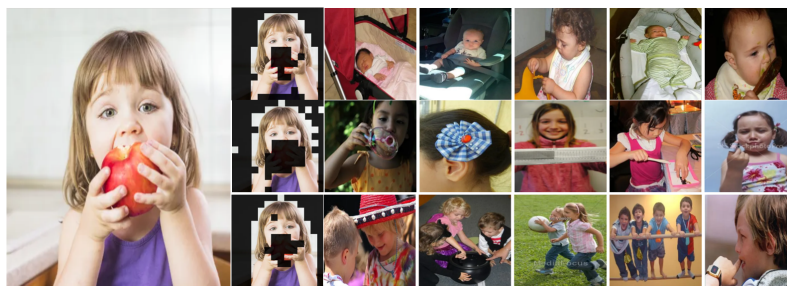

Figure 10. In this sample, pictures activate children and children's eating characteristics through sae. However, the concept of Apple was not recognized and the concept on the right is too similar.

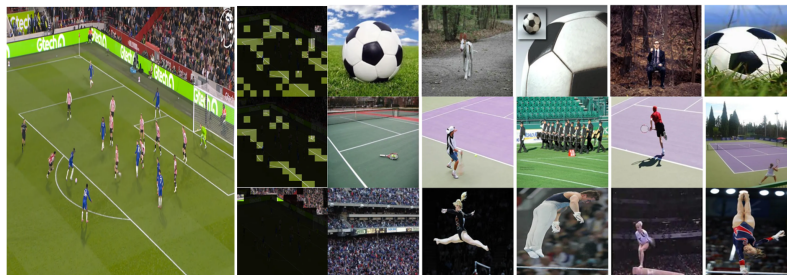

Figure 11. This picture is from a football match. The picture activates the football feature, field, and the crowd. But in the first concept, there were pictures unrelated to football
